# Supplementary figures and images for: Centrifugal step emulsification applied for absolute quantification of nucleic acids by digital droplet RPA
Source: Royal Society of Chemistry journal article supplement (doi:10.1039/c5lc00291e), 2015-01-01

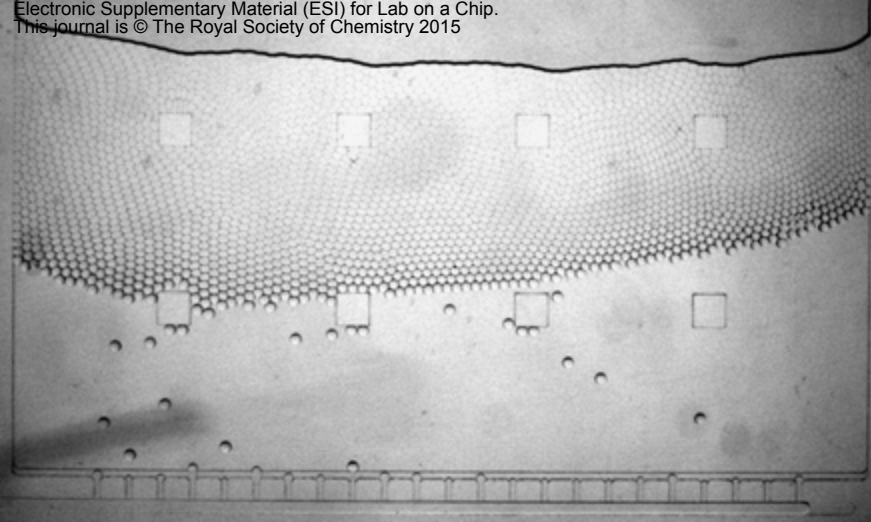

Supplement: c5lc00291e2.pdf [file c5lc00291e2.pdf]
